# Supplementary material for: New cyclotetrasiloxanes bearing sila-alkyl substituted side chains and their applications as templates for gold nanowires
Source: Royal Society of Chemistry journal article supplement (doi:10.1039/c3dt50284h), 2013-01-01
Supplement: c3dt50284h.pdf [file c3dt50284h.pdf]

**Table S1** Crystal data and structure refinement for **2**

|                                         |                                                                               |
|-----------------------------------------|-------------------------------------------------------------------------------|
| Formula                                 | C <sub>36</sub> H <sub>64</sub> O <sub>4</sub> S <sub>4</sub> Si <sub>8</sub> |
| Fw                                      | 913.87                                                                        |
| T, K                                    | 273 (2)                                                                       |
| λ (Å)                                   | 0.71073                                                                       |
| Crystal system                          | Tetragonal                                                                    |
| Space group                             | P 42/n                                                                        |
| a (Å)                                   | 19.665(3)                                                                     |
| b (Å)                                   | 19.665(3)                                                                     |
| c (Å)                                   | 6.6339(13)                                                                    |
| α (deg)                                 | 90                                                                            |
| β (deg)                                 | 90                                                                            |
| γ (deg)                                 | 90                                                                            |
| V, (Å <sup>3</sup> )                    | 2565.4(9)                                                                     |
| Z                                       | 2                                                                             |
| ρ <sub>calcd</sub> (Mg/m <sup>3</sup> ) | 1.183                                                                         |
| μ (mm <sup>-1</sup> )                   | 0.405                                                                         |
| F(000)                                  | 976                                                                           |
| Crystal size                            | 0.20 x 0.10 x 0.10 mm                                                         |
| θ range (deg)                           | 1.46 - 25.00                                                                  |
| Reflections collected                   | 12847                                                                         |
| Unique data                             | 2260                                                                          |
| R <sub>int</sub>                        | 0.0850                                                                        |
| Reflections observed (>2σ)              | 2051                                                                          |
| Data completeness                       | 1.000                                                                         |
| Max. and min. Transmission              | 0.9762 and 0.9532                                                             |
| Data / restraints / parameters          | 2260 / 0 / 121                                                                |
| GOF                                     | 2.015                                                                         |
| Final R indices (I>2σI)                 | R~1 = 0.2031 wR~2 = 0.4786                                                    |
| R indices (all data)                    | R~1 = 0.2117 wR~2 = 0.4832                                                    |
| Largest diff. peak and hole             | 3.425 and -0.930 eÅ <sup>-3</sup>                                             |

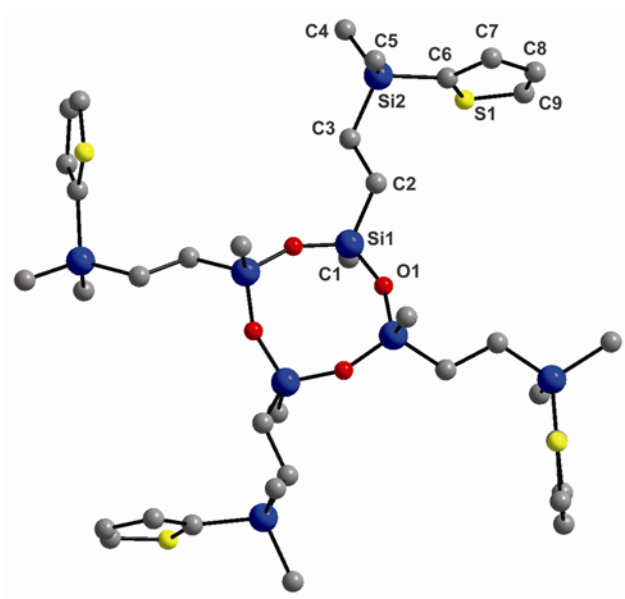

**Fig. S1** Structure of **2** showing *all trans* conformation (all hydrogen atoms are omitted for clarity)

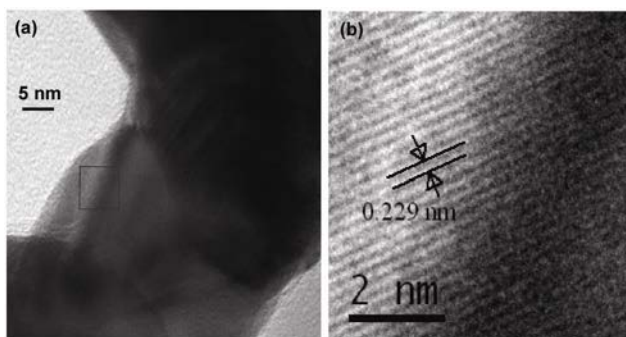

**Fig. S2** (a) HRTEM image of the gold nanowire assemblies in **3** (b) the expanded region of the inset shown in figure (a)
